# Supplementary material for: Phenomics, RNA sequencing and weighted gene co-expression network analysis reveals key regulatory networks and genes involved in the determination of seed hardness in Vicia sativa
Source: Research Square preprint supplement (doi:10.21203/rs.3.rs-6974115/v1), 2025-07-03
Supplement: Supplementary file 1 [file 47e708b5b4ab0dcc11928a31.docx]

**Table S1**. Differences in chemical elements between wild hard-seeded type and cultivated seed species

| Type | K (μg/g) | Ca (μg/g) | Na (μg/g) | Mg (μg/g) | Al (μg/g) | Zn (μg/g) | Fe (μg/g) |
| --- | --- | --- | --- | --- | --- | --- | --- |
| W12 | 3226.31±155.8a | 4352.13±398.56b | 25.3±12.88b | 2149.51±90.25 | 39.48±14.39a | 7.83±1.86b | 95.65±14.39b |
| W30 | 2032.3±284.28b | 6390.61±214.73a | 116.46±57.18a | 1973.63±81.29 | 21.57±11.76b | 10.57±1.9a | 144.72±13.5a |
| Type | Mo (μg/g) | Cd (μg/g) | Cu (μg/g) | Mn (μg/g) | Sr (μg/g) | V (μg/g) | Cr (μg/g) |
| W12 | 0.52±0.15 | 0.07±0.05b | 3.68±0.65b | 20.17±4.11a | 10.91±1.1b | 0.05±0.02 | 0.44±0.06 |
| W30 | 0.57±0.27 | 0.79±0.15a | 11.49±2.1a | 10.02±1.62b | 16.56±1.29a | 0.03±0.01 | 0.38±0.12 |
| Type | Sn (μg/g) | Ba (μg/g) | Pb (μg/g) | Co (μg/g) | Ni (μg/g) | Ti (μg/g) |  |
| W12 | 0.29±0.01 | 5.82±0.31b | 0.02±0.01 | 0.06±0.01 | 0.96±0.19b | 2.94±0.43 |  |
| W30 | 0.28±0.01 | 11.65±0.38a | 0.02±0.01 | 0.08±0.02 | 2.22±0.71a | 3.51±0.08 |  |

**Table S2**. Statistics of data after machine operatio

| Sample | Reads No. | Bases (bp) | Q30 (bp) | N (%) | Q20 (%) | Q30 (%) |
| --- | --- | --- | --- | --- | --- | --- |
| W12_1_1 | 44524312 | 6723171112 | 6271214325 | 0.012807 | 97.69 | 93.28 |
| W12_1_2 | 40683238 | 6143168938 | 5754856498 | 0.012986 | 97.87 | 93.68 |
| W12_1_3 | 45159060 | 6819018060 | 6356195479 | 0.012783 | 97.65 | 93.21 |
| W30_2_1 | 42902252 | 6478240052 | 6166864749 | 0.002557 | 98.51 | 95.19 |
| W30_2_2 | 39062578 | 5898449278 | 5546751282 | 0.002534 | 98.08 | 94.04 |
| W30_2_3 | 38671766 | 5839436666 | 5551209007 | 0.002512 | 98.45 | 95.06 |
| W12_2_1 | 37139076 | 5608000476 | 5300315882 | 0.002541 | 98.26 | 94.51 |
| W12_2_2 | 40694472 | 6144865272 | 5774507381 | 0.002536 | 98.06 | 93.97 |
| W12_2_3 | 41334786 | 6241552686 | 5879426526 | 0.002522 | 98.15 | 94.2 |
| W30_3_1 | 39592116 | 5978409516 | 5639491065 | 0.002561 | 98.19 | 94.33 |
| W30_3_2 | 38318330 | 5786067830 | 5462533788 | 0.002538 | 98.23 | 94.41 |
| W30_3_3 | 36811590 | 5558550090 | 5244285384 | 0.002535 | 98.2 | 94.35 |
| W12_3_1 | 40546330 | 6122495830 | 5822476042 | 0.002523 | 98.48 | 95.1 |
| W12_3_2 | 41227298 | 6225321998 | 5854124129 | 0.002527 | 98.08 | 94.04 |
| W12_3_3 | 41971562 | 6337705862 | 6020184705 | 0.002543 | 98.41 | 94.99 |
| W30_4_1 | 38144778 | 5759861478 | 5427427737 | 0.002505 | 98.12 | 94.23 |
| W30_4_2 | 37368966 | 5642713866 | 5321587209 | 0.002524 | 98.16 | 94.31 |
| W30_4_3 | 38223300 | 5771718300 | 5480800374 | 0.003034 | 98.46 | 94.96 |

**Table S3**. Overall statistics of the sequence

|  | Transcript | Unigene |
| --- | --- | --- |
| Total Length (bp) | 261468601 | 75122054 |
| Sequence Number | 171109 | 62729 |
| Max. Length (bp) | 16812 | 16812 |
| Mean Length (bp) | 1528.08 | 1197.56 |
| N50 (bp) | 2213 | 2032 |
| N50 Sequence No. | 38894 | 11444 |
| N90 (bp) | 718 | 468 |
| N90 Sequence No. | 115318 | 42597 |
| GC% | 38.35 | 38.23 |

**Table S4**. Sample mapping statistics table

| Sample | Total_reads | Mapped_reads | % | Unique_mapped_reads | % |
| --- | --- | --- | --- | --- | --- |
| W12_1_1 | 44040178 | 34443445 | 78.21 | 32302793 | 93.79 |
| W12_1_2 | 40317258 | 31538167 | 78.22 | 29520103 | 93.6 |
| W12_1_3 | 44641220 | 34924239 | 78.23 | 32767744 | 93.83 |
| W12_2_1 | 36808734 | 28466507 | 77.34 | 26799262 | 94.14 |
| W12_2_2 | 40296592 | 31072094 | 77.11 | 29246976 | 94.13 |
| W12_2_3 | 40956608 | 31574514 | 77.09 | 29756941 | 94.24 |
| W12_3_1 | 40247532 | 31990591 | 79.48 | 29773392 | 93.07 |
| W12_3_2 | 40829154 | 32407050 | 79.37 | 29940765 | 92.39 |
| W12_3_3 | 41610942 | 33246075 | 79.9 | 30573023 | 91.96 |
| W30_2_1 | 42574096 | 33504145 | 78.7 | 31229882 | 93.21 |
| W30_2_2 | 38678104 | 30408697 | 78.62 | 28314384 | 93.11 |
| W30_2_3 | 38355094 | 30142604 | 78.59 | 28007226 | 92.92 |
| W30_3_1 | 39222454 | 30191818 | 76.98 | 28712215 | 95.1 |
| W30_3_2 | 37984666 | 29221742 | 76.93 | 27847859 | 95.3 |
| W30_3_3 | 36480664 | 27990792 | 76.73 | 26470249 | 94.57 |
| W30_4_1 | 37764994 | 29802959 | 78.92 | 27707324 | 92.97 |
| W30_4_2 | 37012072 | 29200570 | 78.89 | 27152900 | 92.99 |
| W30_4_3 | 37929466 | 30251203 | 79.76 | 28601930 | 94.55 |

**Table S5**. Summary of annotation results

| Database | Number | Percentage |
| --- | --- | --- |
| NR | 37247 | 59.38 |
| GO | 21931 | 34.96 |
| KEGG | 13669 | 21.79 |
| Pfam | 19523 | 31.12 |
| eggNOG | 34086 | 54.34 |
| Swissprot | 27435 | 43.74 |
| In all database | 6970 | 11.11 |

**Table S6**. KEGG database annotation statistics

| level1 | level2 | count |
| --- | --- | --- |
| Metabolism | Carbohydrate metabolism | 1266 |
| Metabolism | Energy metabolism | 779 |
| Metabolism | Lipid metabolism | 651 |
| Metabolism | Nucleotide metabolism | 216 |
| Metabolism | Amino acid metabolism | 808 |
| Metabolism | Metabolism of other amino acids | 444 |
| Metabolism | Glycan biosynthesis and metabolism | 204 |
| Metabolism | Metabolism of cofactors and vitamins | 410 |
| Metabolism | Metabolism of terpenoids and polyketides | 240 |
| Metabolism | Biosynthesis of other secondary metabolites | 419 |
| Metabolism | Xenobiotics biodegradation and metabolism | 216 |
| Metabolism | Not included in regular maps | 0 |
| Genetic Information Processing | Transcription | 512 |
| Genetic Information Processing | Translation | 1410 |
| Genetic Information Processing | Folding, sorting and degradation | 1087 |
| Genetic Information Processing | Replication and repair | 299 |
| Genetic Information Processing | Information processing in viruses | 0 |
| Environmental Information Processing | Membrane transport | 102 |
| Environmental Information Processing | Signal transduction | 1614 |
| Environmental Information Processing | Signaling molecules and interaction | 9 |
| Cellular Processes | Transport and catabolism | 1079 |
| Cellular Processes | Cell growth and death | 693 |
| Cellular Processes | Cellular community - eukaryotes | 217 |
| Cellular Processes | Cellular community - prokaryotes | 99 |
| Cellular Processes | Cell motility | 112 |
| Organismal Systems | Immune system | 727 |
| Organismal Systems | Endocrine system | 734 |
| Organismal Systems | Circulatory system | 180 |
| Organismal Systems | Digestive system | 340 |
| Organismal Systems | Excretory system | 151 |
| Organismal Systems | Nervous system | 491 |
| Organismal Systems | Sensory system | 64 |
| Organismal Systems | Development and regeneration | 145 |
| Organismal Systems | Aging | 308 |
| Organismal Systems | Environmental adaptation | 759 |

**Table S7**. Statistics of the results of expression difference analysis

| Control | Treat | Up Number | Down Number | DEG Number |
| --- | --- | --- | --- | --- |
| W12_1 | W30_2 | 4056 | 5880 | 9936 |
| W12_2 | W30_3 | 3467 | 5142 | 8609 |
| W12_3 | W30_4 | 4200 | 5259 | 9459 |

**Table S8**. GO enrichment analysis was performed on differentially expressed genes (at the filling stage)

| Category | GO.ID | Term | DEG | FDR |
| --- | --- | --- | --- | --- |
| BP | GO:0071554 | cell wall organization or biogenesis | 245 | 0.0000 |
| BP | GO:0044550 | secondary metabolite biosynthetic process | 105 | 0.0000 |
| BP | GO:0045229 | external encapsulating structure organization | 203 | 0.0000 |
| BP | GO:0006952 | defense response | 510 | 0.0000 |
| BP | GO:0009611 | response to wounding | 150 | 0.0000 |
| BP | GO:0071555 | cell wall organization | 190 | 0.0000 |
| BP | GO:0019748 | secondary metabolic process | 140 | 0.0001 |
| BP | GO:0009308 | amine metabolic process | 60 | 0.0002 |
| BP | GO:0009813 | flavonoid biosynthetic process | 63 | 0.0002 |
| BP | GO:0009309 | amine biosynthetic process | 37 | 0.0002 |
| BP | GO:0042401 | cellular biogenic amine biosynthetic process | 37 | 0.0002 |
| BP | GO:0033559 | unsaturated fatty acid metabolic process | 32 | 0.0008 |
| BP | GO:0009607 | response to biotic stimulus | 472 | 0.0012 |
| BP | GO:0006576 | cellular biogenic amine metabolic process | 43 | 0.0012 |
| BP | GO:0007018 | microtubule-based movement | 65 | 0.0018 |
| BP | GO:0044106 | cellular amine metabolic process | 45 | 0.0019 |
| BP | GO:0043393 | regulation of protein binding | 14 | 0.0019 |
| BP | GO:0009812 | flavonoid metabolic process | 69 | 0.0027 |
| BP | GO:0120254 | olefinic compound metabolic process | 52 | 0.0032 |
| BP | GO:0009699 | phenylpropanoid biosynthetic process | 49 | 0.0036 |
| BP | GO:0043207 | response to external biotic stimulus | 458 | 0.0037 |
| BP | GO:0051707 | response to other organism | 457 | 0.0037 |
| BP | GO:0006629 | lipid metabolic process | 363 | 0.0042 |
| BP | GO:0010410 | hemicellulose metabolic process | 39 | 0.0046 |
| BP | GO:0044419 | biological process involved in interspecies interaction between organisms | 495 | 0.0046 |
| BP | GO:0046499 | S-adenosylmethioninamine metabolic process | 9 | 0.0053 |
| BP | GO:0006596 | polyamine biosynthetic process | 20 | 0.0058 |
| BP | GO:0010383 | cell wall polysaccharide metabolic process | 55 | 0.0064 |
| BP | GO:0071669 | plant-type cell wall organization or biogenesis | 91 | 0.0064 |
| BP | GO:0006595 | polyamine metabolic process | 23 | 0.0073 |
| BP | GO:0008215 | spermine metabolic process | 13 | 0.0075 |
| BP | GO:0006597 | spermine biosynthetic process | 10 | 0.0081 |
| BP | GO:0098542 | defense response to other organism | 373 | 0.0093 |
| CC | GO:0031224 | intrinsic component of membrane | 1135 | 0.0000 |
| CC | GO:0016021 | integral component of membrane | 1090 | 0.0000 |
| CC | GO:0005576 | extracellular region | 385 | 0.0000 |
| CC | GO:0071944 | cell periphery | 1026 | 0.0000 |
| CC | GO:0005871 | kinesin complex | 41 | 0.0000 |
| CC | GO:0005875 | microtubule associated complex | 48 | 0.0004 |
| CC | GO:0031226 | intrinsic component of plasma membrane | 129 | 0.0008 |
| CC | GO:0005886 | plasma membrane | 859 | 0.0020 |
| CC | GO:0005887 | integral component of plasma membrane | 91 | 0.0036 |
| MF | GO:0020037 | heme binding | 133 | 0.0000 |
| MF | GO:0046906 | tetrapyrrole binding | 143 | 0.0000 |
| MF | GO:0016705 | oxidoreductase activity, acting on paired donors, with incorporation or reduction of molecular oxygen | 136 | 0.0000 |
| MF | GO:0005506 | iron ion binding | 122 | 0.0000 |
| MF | GO:0004497 | monooxygenase activity | 104 | 0.0000 |
| MF | GO:0016491 | oxidoreductase activity | 467 | 0.0000 |
| MF | GO:0003824 | catalytic activity | 2399 | 0.0002 |
| MF | GO:0015291 | secondary active transmembrane transporter activity | 121 | 0.0003 |
| MF | GO:0022857 | transmembrane transporter activity | 393 | 0.0015 |
| MF | GO:0005215 | transporter activity | 437 | 0.0027 |
| MF | GO:0003777 | microtubule motor activity | 54 | 0.0032 |
| MF | GO:0022804 | active transmembrane transporter activity | 236 | 0.0036 |
| MF | GO:0003774 | cytoskeletal motor activity | 55 | 0.0046 |
| MF | GO:0004014 | adenosylmethionine decarboxylase activity | 9 | 0.0053 |
| MF | GO:0015293 | symporter activity | 60 | 0.0060 |
| MF | GO:0051119 | sugar transmembrane transporter activity | 29 | 0.0081 |
| MF | GO:0046527 | glucosyltransferase activity | 81 | 0.0095 |

**Table S9**. KEGG enrichment analysis was performed on differentially expressed genes (at the filling stage)

| PathwayID | Pathway | Level2 | FDR | DEG_number |
| --- | --- | --- | --- | --- |
| ko00940 | Phenylpropanoid biosynthesis | Biosynthesis of other secondary metabolites | 0.0000 | 81 |
| ko00073 | Cutin, suberine and wax biosynthesis | Lipid metabolism | 0.0008 | 14 |
| ko00941 | Flavonoid biosynthesis | Biosynthesis of other secondary metabolites | 0.0016 | 23 |
| ko00500 | Starch and sucrose metabolism | Carbohydrate metabolism | 0.0025 | 64 |
| ko00906 | Carotenoid biosynthesis | Metabolism of terpenoids and polyketides | 0.0045 | 18 |
| ko00945 | Stilbenoid, diarylheptanoid and gingerol biosynthesis | Biosynthesis of other secondary metabolites | 0.0072 | 12 |
| ko00410 | beta-Alanine metabolism | Metabolism of other amino acids | 0.0084 | 29 |
| ko00330 | Arginine and proline metabolism | Amino acid metabolism | 0.0225 | 34 |
| ko04075 | Plant hormone signal transduction | Signal transduction | 0.0906 | 61 |
| ko00460 | Cyanoamino acid metabolism | Metabolism of other amino acids | 0.0945 | 27 |
| ko00592 | alpha-Linolenic acid metabolism | Lipid metabolism | 0.0945 | 23 |

**Table S10**. GO enrichment analysis was performed on differentially expressed genes (at the milk-ripe stage)

| Category | GO.ID | Term | DEG | FDR |
| --- | --- | --- | --- | --- |
| BP | GO:0009451 | RNA modification | 192 | 0.0000 |
| BP | GO:0090305 | nucleic acid phosphodiester bond hydrolysis | 275 | 0.0000 |
| BP | GO:0045132 | meiotic chromosome segregation | 32 | 0.0029 |
| BP | GO:0120254 | olefinic compound metabolic process | 50 | 0.0052 |
| BP | GO:0007127 | meiosis I | 34 | 0.0096 |
| CC | GO:0031224 | intrinsic component of membrane | 1014 | 0.0000 |
| CC | GO:0016021 | integral component of membrane | 969 | 0.0002 |
| MF | GO:0004519 | endonuclease activity | 236 | 0.0000 |
| MF | GO:0004518 | nuclease activity | 263 | 0.0000 |
| MF | GO:0016705 | oxidoreductase activity, acting on paired donors, with incorporation or reduction of molecular oxygen | 116 | 0.0000 |
| MF | GO:0016788 | hydrolase activity, acting on ester bonds | 439 | 0.0000 |
| MF | GO:0020037 | heme binding | 107 | 0.0000 |
| MF | GO:0046906 | tetrapyrrole binding | 113 | 0.0002 |
| MF | GO:0005506 | iron ion binding | 99 | 0.0009 |
| MF | GO:0004497 | monooxygenase activity | 85 | 0.0015 |
| MF | GO:0015291 | secondary active transmembrane transporter activity | 113 | 0.0015 |
| MF | GO:0015293 | symporter activity | 59 | 0.0052 |

**Table S11**. KEGG enrichment analysis was performed on differentially expressed genes (at the milk-ripe stage)

| PathwayID | Pathway | Level2 | DEG_number | FDR |
| --- | --- | --- | --- | --- |
| ko00905 | Brassinosteroid biosynthesis | Metabolism of terpenoids and polyketides | 8 | 0.0000 |
| ko03030 | DNA replication | Replication and repair | 30 | 0.0002 |
| ko03430 | Mismatch repair | Replication and repair | 25 | 0.0003 |
| ko00940 | Phenylpropanoid biosynthesis | Biosynthesis of other secondary metabolites | 54 | 0.0007 |
| ko00460 | Cyanoamino acid metabolism | Metabolism of other amino acids | 28 | 0.0020 |
| ko03020 | RNA polymerase | Transcription | 23 | 0.0024 |
| ko00906 | Carotenoid biosynthesis | Metabolism of terpenoids and polyketides | 15 | 0.0030 |
| ko04712 | Circadian rhythm - plant | Environmental adaptation | 16 | 0.0033 |
| ko00941 | Flavonoid biosynthesis | Biosynthesis of other secondary metabolites | 18 | 0.0036 |
| ko00073 | Cutin, suberine and wax biosynthesis | Lipid metabolism | 10 | 0.0038 |
| ko00500 | Starch and sucrose metabolism | Carbohydrate metabolism | 53 | 0.0080 |
| ko00062 | Fatty acid elongation | Lipid metabolism | 14 | 0.0097 |

**Table S12**. GO enrichment analysis was performed on differentially expressed genes (at the wax ripening stage)

| Category | GO.ID | Term | DEG | FDR |
| --- | --- | --- | --- | --- |
| BP | GO:0009451 | RNA modification | 234 | 0.0000 |
| BP | GO:0034470 | ncRNA processing | 183 | 0.0000 |
| BP | GO:0090305 | nucleic acid phosphodiester bond hydrolysis | 303 | 0.0000 |
| BP | GO:0006364 | rRNA processing | 116 | 0.0000 |
| BP | GO:0016072 | rRNA metabolic process | 120 | 0.0000 |
| BP | GO:0042254 | ribosome biogenesis | 169 | 0.0000 |
| BP | GO:0034660 | ncRNA metabolic process | 217 | 0.0001 |
| BP | GO:0022613 | ribonucleoprotein complex biogenesis | 192 | 0.0003 |
| CC | GO:0005730 | nucleolus | 235 | 0.0092 |
| MF | GO:0004519 | endonuclease activity | 248 | 0.0000 |
| MF | GO:0004518 | nuclease activity | 281 | 0.0000 |
| MF | GO:0016788 | hydrolase activity, acting on ester bonds | 455 | 0.0055 |
| MF | GO:0016705 | oxidoreductase activity, acting on paired donors, with incorporation or reduction of molecular oxygen | 113 | 0.0069 |
| MF | GO:0003723 | RNA binding | 598 | 0.0098 |

**Table S13**. KEGG enrichment analysis was performed on differentially expressed genes (at the wax ripening stage)

| PathwayID | Pathway | Level2 | DEG_number | FDR |
| --- | --- | --- | --- | --- |
| ko03008 | Ribosome biogenesis in eukaryotes | Translation | 42 | 0.0000 |
| ko03030 | DNA replication | Replication and repair | 34 | 0.0002 |
| ko00941 | Flavonoid biosynthesis | Biosynthesis of other secondary metabolites | 23 | 0.0003 |
| ko03010 | Ribosome | Translation | 160 | 0.0004 |
| ko03440 | Homologous recombination | Replication and repair | 34 | 0.0006 |
| ko03020 | RNA polymerase | Transcription | 27 | 0.0011 |
| ko03430 | Mismatch repair | Replication and repair | 25 | 0.0044 |

**Table S14**. KEGG enrichment analysis was performed on 2,554 differentially expressed genes

| PathwayID | Pathway | Level1 | list_number | FDR |
| --- | --- | --- | --- | --- |
| ko03020 | RNA polymerase | Genetic Information Processing | 11 | 0.0059 |
| ko03420 | Nucleotide excision repair | Genetic Information Processing | 13 | 0.0112 |
| ko03430 | Mismatch repair | Genetic Information Processing | 9 | 0.0382 |
| ko03030 | DNA replication | Genetic Information Processing | 9 | 0.1330 |
| ko00500 | Starch and sucrose metabolism | Metabolism | 16 | 0.1372 |
| ko00945 | Stilbenoid, diarylheptanoid and gingerol biosynthesis | Metabolism | 4 | 0.1537 |
| ko00941 | Flavonoid biosynthesis | Metabolism | 6 | 0.1902 |
| ko00460 | Cyanoamino acid metabolism | Metabolism | 8 | 0.2527 |
| ko00350 | Tyrosine metabolism | Metabolism | 7 | 0.2758 |
| ko00940 | Phenylpropanoid biosynthesis | Metabolism | 10 | 0.2758 |
| ko00966 | Glucosinolate biosynthesis | Metabolism | 2 | 0.2758 |
| ko00061 | Fatty acid biosynthesis | Metabolism | 6 | 0.2787 |
| ko00410 | beta-Alanine metabolism | Metabolism | 7 | 0.2787 |
| ko00950 | Isoquinoline alkaloid biosynthesis | Metabolism | 4 | 0.2930 |
| ko03440 | Homologous recombination | Genetic Information Processing | 7 | 0.3865 |
| ko00906 | Carotenoid biosynthesis | Metabolism | 4 | 0.3865 |
| ko00250 | Alanine, aspartate and glutamate metabolism | Metabolism | 6 | 0.6257 |
| ko00904 | Diterpenoid biosynthesis | Metabolism | 2 | 0.6257 |
| ko00360 | Phenylalanine metabolism | Metabolism | 4 | 0.6257 |
| ko00260 | Glycine, serine and threonine metabolism | Metabolism | 6 | 0.6257 |

**Table S15**. The list of candidate genes in this study

| Gene | Trait | PersonCorrelationValue | Pvalue |
| --- | --- | --- | --- |
| TRINITY_DN3202_c0_g3 | Seed diameter | 0.6990 | 0.0012 |
| TRINITY_DN3663_c0_g2 | Seed diameter | 0.7066 | 0.0010 |
| TRINITY_DN1963_c0_g1 | Seed diameter | 0.7078 | 0.0010 |
| TRINITY_DN17484_c0_g1 | Seed diameter | 0.7171 | 0.0008 |
| TRINITY_DN12479_c0_g1 | Seed diameter | 0.7918 | 0.0001 |
| TRINITY_DN818_c0_g1 | Seed diameter | 0.8325 | 0.0000 |
| TRINITY_DN16154_c0_g1 | Seed diameter | 0.8954 | 0.0000 |
| TRINITY_DN4437_c0_g1 | Seed coat thickness | 0.7065 | 0.0010 |
| TRINITY_DN477_c0_g1 | Seed coat thickness | 0.7185 | 0.0008 |
| TRINITY_DN5404_c0_g2 | Seed coat thickness | 0.7196 | 0.0008 |
| TRINITY_DN26784_c0_g1 | Seed coat thickness | 0.7232 | 0.0007 |
| TRINITY_DN4058_c0_g1 | Seed coat thickness | 0.7491 | 0.0003 |
| TRINITY_DN2362_c0_g1 | Seed coat thickness | 0.7562 | 0.0003 |
| TRINITY_DN3402_c0_g1 | Seed coat thickness | 0.8070 | 0.0001 |
| TRINITY_DN1542_c0_g2 | Palisade tissue thickness | 0.7124 | 0.0009 |
| TRINITY_DN108_c0_g1 | Palisade tissue thickness | 0.7283 | 0.0006 |
| TRINITY_DN7853_c0_g1 | Palisade tissue thickness | 0.7438 | 0.0004 |
| TRINITY_DN13607_c0_g1 | Palisade tissue thickness | 0.7461 | 0.0004 |
| TRINITY_DN4244_c0_g1 | Palisade tissue thickness | 0.7491 | 0.0003 |
| TRINITY_DN1127_c0_g1 | Palisade tissue thickness | 0.7829 | 0.0001 |
| TRINITY_DN1476_c1_g1 | Ratio of palisade to seed coat | 0.6955 | 0.0014 |
| TRINITY_DN12417_c1_g1 | Ratio of palisade to seed coat | 0.7052 | 0.0011 |
| TRINITY_DN3075_c0_g1 | Ratio of palisade to seed coat | 0.7077 | 0.0010 |
| TRINITY_DN3979_c0_g1 | Ratio of palisade to seed coat | 0.7166 | 0.0008 |
| TRINITY_DN6069_c0_g1 | Ratio of palisade to seed coat | 0.7304 | 0.0006 |
| TRINITY_DN6606_c0_g1 | Ratio of palisade to seed coat | 0.7344 | 0.0005 |
| TRINITY_DN1196_c0_g3 | Ratio of palisade to seed coat | 0.7432 | 0.0004 |
| TRINITY_DN4975_c0_g2 | Ratio of palisade to seed coat | 0.7953 | 0.0001 |

**Table S16**. qRT-PCR Primer information

| Gene Name | Forward primer sequence | Reverse primer sequence | Product length |
| --- | --- | --- | --- |
| *TRINITY_DN3663_c0_g2* | CACCAAATGGATTAGCAACACC | CCACTCCCTTCAACATTGAGTA | 102 |
| *TRINITY_DN3402_c0_g1* | TGTGTCTGCGACGGATAAT | GGCCACAGCAATCAAGAAATC | 119 |
| *TRINITY_DN13607_c0_g1* | AGGAAGCAGGGTTTGGTTAG | ATCCAGCCTCCAAAGGAAAG | 122 |
| *TRINITY_DN6606_c0_g1* | GTGTGTGGTGATTAGTGGTGTA | CCAAGTACCAACATAGGAGTGG | 124 |
